# Supplementary material for: Losartan improves the therapeutic effect of metronomic cyclophosphamide in triple negative mammary cancer models
Source: PubMed Central journal article supplement (PMC7429183; doi:10.18632/oncotarget.27694), 2020-08-11
Supplement: oncotarget-11-3048-s001.pdf [file oncotarget-11-3048-s001.pdf]

## Losartan improves the therapeutic effect of metronomic cyclophosphamide in triple negative mammary cancer models

### SUPPLEMENTARY MATERIALS

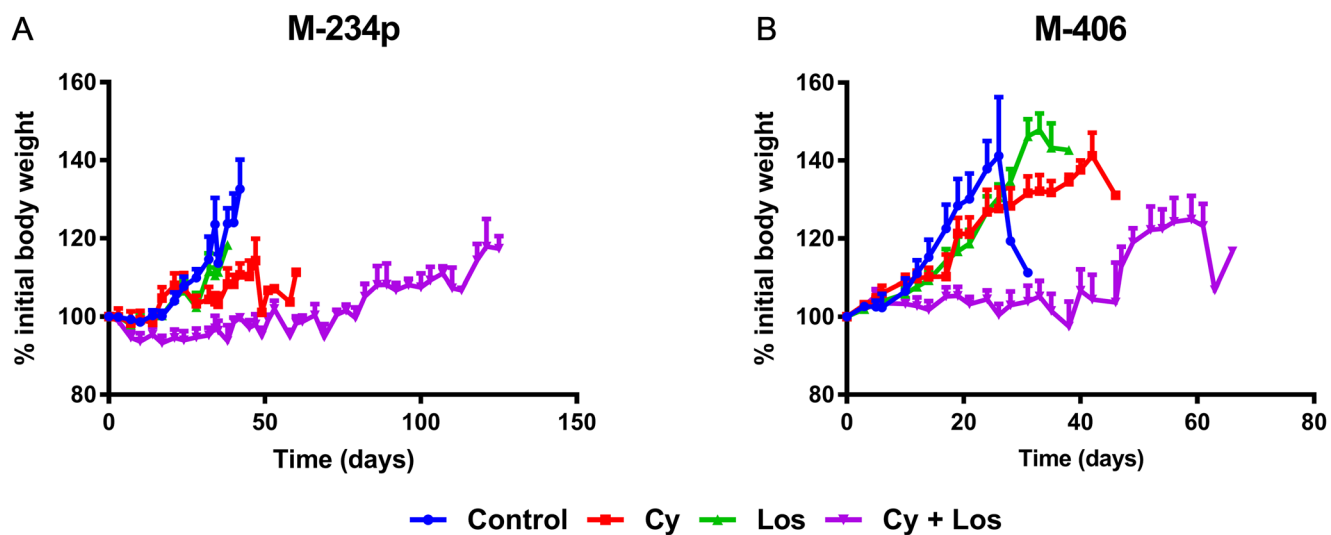

Supplementary Figure 1: Evolution of body weight: data for each time point are mean  $\pm$  SEM of the percentage of initial body weight. (A) M-234p, (B) M-406.
